# Supplementary material for: Comparison between gastrostomy feeding and self-expandable metal stent insertion for patients with esophageal cancer and dysphagia
Source: PLoS One. 2017 Jun 20;12(6):e0179522. doi: 10.1371/journal.pone.0179522 (PMC5478133; doi:10.1371/journal.pone.0179522)
Supplement: S1 File — (XLSX) [file pone.0179522.s001.xlsx]

## Sheet: Sheet1
Age	Gender	Group	Histology	Stage	Location prox기준	tumor _length (cm)	CTx	RTx	Surgery	Weight _before 시술 한달전 -시술일까지	Weight _after 시술후 1달 or 2달후	Wt.change	Albumin _before 시술 한달전 -시술일까지	Albumin _after 시술후 1달 or 2달후	Albumin change	AI	Number _of_AI	Complication	Asp pneu monia	Death	Stage: 2	survival months
65	1	1	1	4	3	6	1	1	0	40.6	missing		missing	missing		0	0	0	0	1	2	1.31972
73	1	1	1	4	3	5	0	0	0	52.3	missing		4	missing		0	0	0	0	1	2	2.33664
76	1	1	1	4	1	8	0	0	0	46.6	46	-0.6	3.2	missing		0	0	0	0	1	2	5.65085
62	1	1	1	4	3	8.2	1	0	0	53	missing		3.8	missing		0	0	0	0	1	2	0.861213
49	2	2	1	4	1	6	2	0	0	38.95	38.1	-0.85	2.9	3.5	0.6	0	0	0	0	1	2	15.0271
61	1	1	1	4	3	14	1	1	0	57.85	54.2	-3.65	3.1	2.5	-0.6	0	0	0	0	1	2	2.95887
78	1	1	1	4	4	12	0	0	0	42.4	42.5	0.1	3.3	missing		0	0	0	0	1	2	1.09394
75	1	1	1	4	4	9	0	0	0	59.7	missing		3.9	missing		0	0	0	0	1	2	5.55225
54	1	1	1	4	3	8	1	2	0	48.55	47.95	-0.6	3.9	2.4	-1.5	0	0	0	0	1	2	1.87882
58	1	1	1	4	3	7	1	1	0	63	57.8	-5.2	4	3.6	-0.4	0	0	0	0	1	2	2.18032
69	1	1	1	4	4	7	0	0	0	missing	missing		3.3	missing		0	0	0	0	1	2	2.93027
59	1	1	1	4	4	6	1	0	0	42.3	42.3	0	3.9	2.8	-1.1	0	0	0	0	1	2	3.65143
55	1	1	1	4	2	10	1	1	0	53.7	56.55	2.85	4	2.9	-1.1	0	0	0	0	1	2	3.13169
69	1	1	1	4	3	10	1	0	0	48.86	47.5	-1.36	3.6	2.9	-0.7	0	0	0	0	1	2	2.56756
58	1	1	1	4	4	5	1	0	0	49.05	48.45	-0.6	3.7	3.1	-0.6	0	0	0	1	1	2	2.70462
57	1	1	1	4	3	10	0	0	0	missing	missing		3.1	missing		0	0	0	0	1	2	0.471393
85	2	1	9	4	4	2	0	0	0	43.3	missing		2.9	missing		0	0	0	0	1	2	15.8847
72	1	1	1	4	3	11	0	2	0	48.25	missing		2.8	missing		0	0	0	0	1	2	2.67143
77	1	1	1	4	3	7	0	1	0	47.7	42.2	-5.5	3.5	3.2	-0.3	0	0	0	0	1	2	4.7631
52	1	1	1	4	2	10	0	0	0	57	54	-3	4	missing		0	0	0	0	1	2	5.15736
68	1	1	1	4	3	6	0	1	0	40	39.7	-0.3	4	3.5	-0.5	0	0	0	0	1	2	3.78768
73	1	1	1	4	3	10	0	0	0	missing	missing		3.2	missing		0	0	0	0	1	2	1.75013
54	1	1	1	4	4	3	1	1	0	39.25	44	4.75	3.1	3.7	0.6	0	0	0	0	1	2	3.25422
56	1	1	1	4	3	12	2	0	0	49.65	51.4	1.75	4.6	3.7	-0.9	0	0	0	0	1	2	5.28673
58	1	2	1	4	2	8	1	1	0	60.5	missing		3.7	missing		0	0	0	0	1	2	0.960614
67	1	1	1	4	3	11	1	0	0	61.7	57.9	-3.8	4.1	3.1	-1	0	0	0	0	1	2	9.35444
65	1	1	1	4	1	5	1	1	0	44	missing		2.6	missing		0	0	0	0	1	2	1.09294
71	2	1	1	4	2	5	0	2	0	50.3	missing		4.2	missing		0	0	0	0	1	2	5.55112
81	1	1	1	4	2	3	0	0	0	45	missing		3.4	missing		0	0	0	0	1	2	5.78744
67	1	1	1	4	4	5	1	1	0	missing	missing		3.9	missing		0	0	0	0	0	2	145.716
73	1	2	1	4	1	10	1	1	0	49.55	48.5	-1.05	3.6	3.9	0.3	0	0	0	0	1	2	9.94357
59	1	1	1	4	3	10	1	0	0	46	45	-1	4.4	2.7	-1.7	0	0	0	0	1	2	5.71539
66	1	1	1	4	4	5	0	0	0	missing	missing		3.7	missing		0	0	0	0	1	2	2.95716
58	1	1	1	4	2	8	1	0	0	43	44.6	1.6	3.3	2.6	-0.7	0	0	0	0	1	2	3.2578
58	1	1	1	4	4	5	2	0	0	49.7	45.65	-4.05	3.8	3.9	0.1	1	2	0	0	1	2	10.8982
86	2	1	1	4	2	7	0	0	0	66.3	missing		4.2	missing		0	0	0	0	1	2	1.97439
75	1	1	9	4	3	8	0	0	0	45.6	44.6	-1	2.6	2.4	-0.2	0	0	0	0	1	2	4.82899
41	1	1	1	4	3	9	2	1	0	56.5	54	-2.5	3.1	2.3	-0.8	1	1	0	0	1	2	2.63634
48	1	1	9	4	4	5	1	1	0	50	missing		4	missing		0	0	0	0	1	2	0.498851
76	1	1	1	4	2	5.5	0	1	0	45.5	45.45	-0.05	3.7	2.9	-0.8	0	0	0	0	1	2	4.08227
75	1	1	1	4	4	6	1	1	0	58.3	52.5	-5.8	4.1	3.2	-0.9	0	0	0	0	1	2	5.48436
72	1	1	1	4	4	11	1	0	0	49	48.4	-0.6	3.3	3.4	0.1	0	0	0	0	1	2	4.95976
64	2	2	1	4	1	6	1	1	0	38	missing		3.7	missing		0	0	0	0	1	2	56.1122
79	1	1	1	4	1	3	0	0	0	46	missing		3.9	missing		0	0	0	0	1	2	3.94637
64	1	1	2	4	4	10	1	2	0	48.5	42	-6.5	3.3	3.2	-0.1	1	1	0	0	1	2	0.990763
57	2	1	9	4	4	5	1	1	0	40	missing		3.1	missing		0	0	0	0	1	2	3.18762
68	1	1	1	4	4	10	1	2	0	43	41.3	-1.7	3.9	3.5	-0.4	0	0	0	0	1	2	3.8112
54	1	1	1	4	4	6	1	2	0	72.5	59.5	-13	3.9	3.8	-0.1	1	1	0	0	1	2	4.13796
60	1	1	1	4	2	2	1	2	0	54.2	57.3	3.1	4	3.8	-0.2	0	0	0	0	1	2	8.50252
65	1	1	2	4	4	6	0	0	0	missing	missing		2.3	missing		0	0	0	0	1	2	0.609354
65	1	1	1	4	3	5	1	0	0	42.6	missing		4.1	3.4	-0.7	0	0	0	0	1	2	5.09462
81	1	1	1	4	3	10	0	0	0	missing	missing		2.7	missing		0	0	0	1	1	2	1.19015
56	1	1	1	4	2	5	1	1	0	missing	missing		3.7	missing		0	0	0	0	1	2	1.48257
54	1	1	1	4	4	8	0	1	0	42.2	missing		2.8	missing		0	0	0	0	1	2	1.09308
69	1	1	1	4	4	6	1	0	0	63.5	missing		4.3	missing		0	0	0	0	1	2	5.51661
54	1	1	1	4	3	6	1	0	0	missing	missing		2.8	missing		0	0	0	0	1	2	0.632795
75	1	1	1	4	3	7	0	0	0	missing	missing		3.3	missing		0	0	0	0	1	2	0.667396
62	1	1	2	4	4	9	1	0	0	57	missing		3.4	missing		0	0	0	0	1	2	5.25565
73	1	1	1	4	3	7	0	0	0	46.45	missing		2.9	missing		0	0	0	0	1	2	8.79681
61	1	1	1	4	3	5	1	1	0	68	62	-6	3.7	2.9	-0.8	0	0	0	0	1	2	2.7313
57	1	1	1	4	4	4	1	1	0	39	missing		2.7	missing		0	0	0	0	1	2	1.02963
74	1	1	1	4	3	6	0	2	0	48	missing		3.9	missing		1	1	0	0	1	2	8.99518
65	1	2	1	4	1	3	2	1	0	48	missing		2.3	missing		0	0	0	0	1	2	2.14444
59	1	1	1	4	3	12	1	0	0	55	50.5	-4.5	2.6	3.3	0.7	1	1	0	0	1	2	9.32194
70	1	1	1	3	4	5	1	1	0	48	47	-1	3.1	2.8	-0.3	0	0	0	0	1	1	1.97556
54	1	1	1	4	4	6	1	2	0	65	62.8	-2.2	4	3.8	-0.2	0	0	0	0	1	2	7.55454
67	1	1	1	4	3	13	1	2	0	51	52.3	1.3	2.8	3	0.2	0	0	0	0	1	2	4.86396
53	1	1	1	4	4	5	1	2	0	56.7	57.5	0.8	4.4	2.9	-1.5	0	0	0	0	1	2	13.1277
61	1	1	1	4	2	20	1	2	0	48.1	44.6	-3.5	2.9	3.1	0.2	0	0	0	0	1	2	4.63501
43	1	1	1	3	2	8	2	2	2	57	64	7	3.4	3.5	0.1	0	0	0	0	1	1	17.0951
82	1	1	1	4	4	5	0	0	0	missing	missing		3.2	missing		0	0	0	0	1	2	4.01761
47	1	1	1	4	4	5	2	0	0	54	53.7	-0.3	3.1	2.7	-0.4	0	0	0	0	1	2	5.78145
59	1	1	1	4	4	5	1	0	0	53	57.3	4.3	4.3	3.9	-0.4	0	0	0	0	1	2	13.1274
49	1	2	1	4	1	20	2	2	0	45.6	52.7	7.1	3	3.1	0.1	0	0	0	0	1	2	12.8246
69	1	1	1	4	4	7	1	1	0	46.7	45.8	-0.9	3.7	3.3	-0.4	0	0	0	0	1	2	5.83607
73	2	1	1	4	4	8	1	2	0	38	37.3	-0.7	3	2.6	-0.4	0	0	0	0	1	2	1.97937
61	1	1	1	4	1	6	1	2	0	46.5	50.7	4.2	4	3.9	-0.1	0	0	0	0	1	2	6.37276
68	1	1	1	4	3	10	0	2	0	76.5	68	-8.5	3.3	3.2	-0.1	1	1	0	1	1	2	3.4885
50	1	2	1	4	1	2.5	2	2	0	67.4	63.8	-3.6	3.3	3.2	-0.1	0	0	0	0	1	2	8.5364
62	1	1	1	4	2	5	1	2	0	50	missing		2.2	missing		0	0	0	0	1	2	1.35836
69	1	1	1	4	2	8	1	2	0	46	46	0	3.3	3.4	0.1	0	0	0	1	1	2	2.07835
64	1	2	1	2	4	5	1	1	2	48.2	44	-4.2	3.2	3.7	0.5	0	0	0	0	1	1	10.5036
48	1	1	1	4	3	10	1	2	0	50	46.5	-3.5	3.6	2.3	-1.3	1	1	0	0	1	2	6.73117
69	1	1	1	4	4	4	2	0	0	42	47	5	3.4	3.3	-0.1	1	1	0	0	1	2	16.8651
66	1	1	1	4	3	3	0	0	0	missing	missing		3.4	missing		0	0	0	0	1	2	2.86487
27	1	1	2	4	4	5	1	1	0	59.6	missing		4.1	3.5	-0.6	1	1	0	0	1	2	2.89509
54	1	1	1	4	2	7	1	0	0	65	62	-3	4.5	2.4	-2.1	1	1	0	0	1	2	4.37015
67	1	1	1	4	4	5	1	0	0	54.8	56.5	1.7	3.8	3.8	0	1	1	0	1	1	2	20.014
81	1	1	1	2	2	8	0	2	0	54.1	57.7	3.6	3.7	missing		0	0	0	0	1	1	3.32499
89	1	1	1	4	3	6	0	0	0	61.8	missing		3.1	missing		0	0	0	0	1	2	4.59911
50	1	2	1	4	4	8	1	0	0	57.2	55.4	-1.8	3.9	3.9	0	0	0	0	0	1	2	5.41956
72	1	1	1	4	4	4	2	0	0	56.7	58.2	1.5	4.1	3.7	-0.4	1	2	4	0	1	2	11.555
59	1	1	1	4	2	7	1	2	0	54.5	50	-4.5	3.3	3.4	0.1	0	0	0	1	1	2	8.33553
64	1	1	1	4	4	9	1	0	0	50	missing		3.6	missing		0	0	0	0	1	2	4.50344
64	1	2	1	4	2	8	2	0	0	53	48.6	-4.4	3.5	3.1	-0.4	0	0	0	1	1	2	4.27195
67	1	1	1	4	2	8	1	0	0	61	60	-1	3.7	3.7	0	0	0	0	0	1	2	12.2062
64	1	1	1	4	2	9	2	0	0	56.4	55	-1.4	3.3	2.6	-0.7	0	0	0	0	1	2	3.7147
53	1	1	1	4	4	8	2	0	0	53.2	51.5	-1.7	3.9	3.5	-0.4	1	2	4	0	1	2	14.0461
65	1	1	1	4	3	5	2	2	0	50.9	50.6	-0.3	3.6	3.5	-0.1	0	0	0	1	1	2	11.5867
69	2	2	1	4	2	10	2	2	0	48.8	46	-2.8	3.4	3.6	0.2	0	0	0	0	1	2	6.4995
54	1	1	1	4	3	8	1	2	0	50.3	50.5	0.2	2.1	2.4	0.3	1	1	0	1	1	2	2.33887
57	1	1	1	3	3	7	1	0	0	63.1	62.3	-0.8	4.3	4.1	-0.2	0	0	0	0	1	1	5.22522
73	1	1	1	4	2	3	2	0	0	76.4	71.4	-5	3.2	3.7	0.5	1	2	4	1	1	2	14.0459
79	1	1	1	2	4	4	0	0	0	50.3	50.6	0.3	4.4	missing		0	0	0	0	1	1	2.33876
65	1	2	1	4	3	7.5	1	0	0	43.3	43.7	0.4	3.3	2.7	-0.6	0	0	0	1	1	2	1.8464
74	1	2	1	4	2	6	0	0	0	48.2	47.8	-0.4	3.6	3.4	-0.2	0	0	0	0	1	2	8.34027
53	2	2	1	3	2	5	1	1	2	46.1	47.1	1	4	3.7	-0.3	0	0	0	0	0	1	72.9603
53	1	1	2	4	2	8	1	0	0	47.5	54.4	6.9	3.2	2	-1.2	0	0	0	0	1	2	1.33022
55	1	1	2	4	4	8	2	0	2	60.3	61	0.7	3.2	3.6	0.4	0	0	0	1	1	2	55.0594
67	1	1	1	4	2	6	1	0	0	46	44.8	-1.2	3.8	missing		0	0	0	0	1	2	2.33828
54	1	1	1	4	3	7	1	0	0	49	50	1	2.3	2.9	0.6	0	0	0	1	1	2	1.12614
78	1	1	1	4	2	5	2	0	0	60	57.3	-2.7	3.9	3.6	-0.3	0	0	0	0	1	2	10.2075
65	1	1	1	4	4	6	2	2	2	83.4	77.5	-5.9	3.4	3.4	0	0	0	0	0	0	2	65.7482
83	1	1	1	4	3	4	0	0	0	missing	missing		3.8	missing		0	0	0	0	1	2	10.8631
66	1	1	2	4	4	9	1	0	0	49.9	48.4	-1.5	3.4	3.4	0	1	1	0	0	1	2	9.03442
71	1	1	1	4	4	5	1	0	0	51.5	missing		3	2.5	-0.5	0	0	0	0	1	2	2.33967
73	1	1	1	4	2	6	1	2	0	51.5	50.75	-0.75	4	3.6	-0.4	0	0	0	1	1	2	6.07762
73	1	1	1	4	3	6	2	0	0	53.7	51.7	-2	3.7	3.1	-0.6	0	0	0	1	1	2	10.9358
66	1	1	1	4	4	8	2	0	0	70	70.8	0.8	4	4.1	0.1	0	0	0	0	1	2	9.71827
67	1	1	1	3	2	6	2	0	0	60	54.6	-5.4	4.1	3.8	-0.3	0	0	0	0	1	1	25.8136
56	1	1	1	3	3	10	2	2	0	47.1	48.4	1.3	2.8	2.9	0.1	1	1	0	1	1	1	1.81702
51	1	1	1	4	4	4	2	0	0	53.5	46.7	-6.8	2.9	2.8	-0.1	0	0	0	0	1	2	2.30835
48	2	2	1	3	1	1	2	1	2	44.2	43.3	-0.9	4.2	3.5	-0.7	0	0	0	0	0	1	77.4195
75	1	1	1	4	3	5	1	1	0	49.7	46.5	-3.2	3.7	3.4	-0.3	0	0	0	0	1	2	3.22234
74	1	2	1	3	3	5	1	2	0	59.4	57.9	-1.5	4.2	3.6	-0.6	0	0	0	1	1	1	8.60207
63	1	1	1	3	3	6	2	2	0	58.1	58.3	0.2	4	3.7	-0.3	1	2	0	1	1	1	7.71616
60	1	2	1	3	3	3	0	2	0	42.5	43.9	1.4	4.3	3.5	-0.8	0	0	0	0	1	1	8.37386
66	1	1	1	4	3	3	1	0	0	49.7	57.6	7.9	4.3	3.4	-0.9	0	0	0	0	1	2	3.19094
74	1	1	1	4	3	7	1	0	0	34.1	36.7	2.6	3.4	3.4	0	1	2	0	0	1	2	1.1931
52	1	1	1	4	3	3	1	0	0	55	56	1	4.2	4.1	-0.1	1	1	0	1	1	2	11.8811
57	1	2	1	3	1	4	1	1	0	56	54.3	-1.7	3.2	3.7	0.5	0	0	0	0	1	1	6.37157
52	2	2	1	2	1	5	2	2	0	52.3	49.9	-2.4	4.1	3.6	-0.5	0	0	0	1	0	1	76.1109
56	1	2	1	3	4	5	2	2	0	51	53.6	2.6	4	3.8	-0.2	0	0	0	0	1	1	27.0338
50	2	2	1	2	1	5	1	1	2	42.8	41.4	-1.4	3.7	3.6	-0.1	0	0	0	0	0	1	69.0298
69	1	1	1	4	3	5	1	2	0	59.2	61.4	2.2	3.9	4.1	0.2	1	1	0	0	1	2	2.00996
67	1	1	1	4	3	6	1	0	0	53.5	52.6	-0.9	4.1	3.7	-0.4	0	0	0	1	1	2	11.68
70	1	2	1	4	2	7	0	0	0	59.6	missing		3.8	missing		0	0	0	0	1	2	5.32161
72	1	1	1	4	4	4	1	0	0	51.7	50.2	-1.5	3.5	4.1	0.6	1	1	0	1	1	2	14.3746
69	1	2	1	4	2	7	2	2	2	49.3	48.7	-0.6	3.6	3.6	0	0	0	0	0	1	2	5.42096
73	1	2	1	4	4	8	0	1	0	58.6	61.2	2.6	4.1	2.7	-1.4	0	0	0	0	1	2	1.2251
61	1	1	1	4	2	10	2	0	0	48.4	49.1	0.7	3.4	2.6	-0.8	1	1	0	0	1	2	1.22519
54	2	2	1	4	2	4	1	0	0	43.6	43.5	-0.1	3.9	4.4	0.5	0	0	0	0	1	2	8.73293
65	1	1	1	4	4	8	1	0	0	57.6	55.3	-2.3	4.4	3.7	-0.7	0	0	0	0	1	2	3.52077
66	1	1	1	4	2	10	2	0	0	57.1	58	0.9	3.7	3.6	-0.1	0	0	0	0	1	2	2.6029
73	1	1	1	4	4	5	1	0	0	55.15	56.2	1.05	3.3	3.8	0.5	0	0	0	0	1	2	5.02686
58	1	2	1	4	3	5	2	2	0	55.7	56.8	1.1	4.4	4.2	-0.2	0	0	0	0	1	2	2.04341
57	1	2	1	3	1	3.5	1	1	2	62.3	59.6	-2.7	4.6	3.4	-1.2	0	0	0	0	1	1	7.38787
60	2	1	1	4	3	4	1	0	0	52	51.6	-0.4	4.4	3.4	-1	1	2	0	0	1	2	3.41743
55	2	2	1	4	1	7	1	1	0	41.1	44.6	3.5	3.4	4.1	0.7	0	0	0	0	1	2	14.7313
79	1	1	1	4	2	3	0	0	0	57.9	57.9	0	4.6	4.3	-0.3	0	0	0	0	1	2	3.3226
70	1	2	1	4	1	3.5	2	2	0	57.3	56.8	-0.5	3.9	4.3	0.4	1	1	0	1	1	2	13.651
49	1	1	1	4	3	5	2	0	0	75.7	74.8	-0.9	4.4	4.2	-0.2	1	1	0	0	1	2	10.4685
65	1	1	1	4	3	10	0	0	0	48	46.25	-1.75	3.5	3.7	0.2	0	0	0	0	1	2	2.79865
67	1	1	1	4	4	5	2	0	0	42.5	44	1.5	4.4	4	-0.4	0	0	0	0	1	2	3.71954
64	1	1	1	4	3	8	2	0	0	56.7	60.7	4	4.1	3.5	-0.6	1	1	0	1	1	2	8.36834
60	1	1	1	4	4	4	1	1	0	73.3	65.8	-7.5	4.3	4.5	0.2	0	0	0	0	1	2	1.58441
69	1	1	1	4	3	4	0	0	0	55.4	57.5	2.1	4.4	3.5	-0.9	0	0	0	0	1	2	0.699286
56	1	1	1	3	4	5	2	1	0	48.65	missing		3.5	3.1	-0.4	0	0	4	0	1	1	0.242972
74	1	1	1	4	3	7	2	0	0	36.4	37.9	1.5	4.5	3.4	-1.1	1	2	0	1	1	2	2.79792
65	1	1	1	4	3	7	1	0	0	46.4	49.8	3.4	3.5	3.1	-0.4	0	0	0	0	1	2	1.32451
72	1	2	1	3	3	8	0	2	2	51.2	53.6	2.4	3.8	4	0.2	0	0	0	0	0	1	36.1752
75	1	2	1	3	1	3	2	2	0	62.8	61.6	-1.2	4.7	4.4	-0.3	0	0	0	0	0	1	36.0441
49	1	2	1	4	2	3	1	1	0	67	65	-2	3.5	4.4	0.9	0	0	0	0	1	2	10.504
51	1	2	1	3	2	8	1	1	2	53.9	59.2	5.3	4.5	4.3	-0.2	0	0	0	0	0	1	53.7798
57	1	2	1	4	2	6	1	1	0	39.35	40	0.65	4.2	4.2	0	0	0	0	1	1	2	5.976
71	1	2	1	4	1	6	2	0	0	44.7	45.6	0.9	4.1	4	-0.1	0	0	0	0	1	2	13.3197
76	1	1	1	2	4	5	0	1	0	51	58.5	7.5	3.8	missing		0	0	0	0	1	1	1.19218
71	1	1	1	4	2	10	2	0	0	52.4	47.35	-5.05	3.8	3.7	-0.1	0	0	0	0	1	2	4.86325
67	1	1	1	4	4	2	1	1	0	53.9	52.85	-1.05	3.3	3.2	-0.1	0	0	0	0	1	2	8.44342
65	1	1	1	4	2	8	0	0	0	55.1	54.6	-0.5	4.1	4.5	0.4	0	0	0	0	1	2	2.60316
53	1	1	1	4	4	10	1	0	0	51	57.9	6.9	4.5	4.2	-0.3	0	0	0	0	1	2	1.74682
51	1	1	1	4	1	5	1	1	0	60	59.5	-0.5	4.2	4.2	0	1	2	0	0	1	2	4.99121
63	1	2	1	4	4	5	1	1	0	57	missing		3.3	3.5	0.2	0	0	0	0	1	2	0.204088
62	1	1	1	4	4	4	1	0	0	60	56.7	-3.3	3.3	2.8	-0.5	0	0	0	0	1	2	2.47184
80	1	2	1	4	3	10	0	2	0	42.2	43.05	0.85	3.4	2.9	-0.5	0	0	0	0	1	2	4.10905
77	1	1	1	4	3	8	0	0	0	52.85	49.55	-3.3	3.2	missing		0	0	0	0	1	2	4.79746
59	1	2	2	2	2	5	2	2	0	61.5	61.25	-0.25	4.4	3.8	-0.6	0	0	0	0	1	1	27.4204
57	1	1	1	4	2	3	2	2	0	55.4	62.5	7.1	4.3	2.1	-2.2	1	1	0	0	1	2	3.22616
59	1	1	1	4	4	5	1	2	0	79.7	73.1	-6.6	4.1	4	-0.1	1	1	0	1	1	2	9.45326
50	1	1	1	4	3	8	2	0	0	75.4	76	0.6	4.5	4.2	-0.3	1	1	0	0	1	2	8.79504
34	2	1	1	4	4	3	1	0	0	41	43	2	3.2	3	-0.2	0	0	0	0	1	2	4.56532
70	1	1	1	4	4	4	1	0	0	62.9	missing		4.6	4	-0.6	0	0	0	0	1	2	2.79627
59	1	1	1	4	4	4	1	0	0	53.4	50.9	-2.5	4.5	3.7	-0.8	0	0	0	1	1	2	6.07418
43	2	1	1	4	3	5	2	2	0	51	missing		3.7	missing		0	0	0	0	1	2	4.64131
69	1	1	1	4	4	4	1	0	0	65.3	66.9	1.6	3.9	3.6	-0.3	1	1	0	1	1	2	7.87963
71	1	1	1	4	4	3	2	0	0	41.3	39.25	-2.05	4.3	3.3	-1	1	1	4	0	1	2	13.1914
67	1	1	1	4	4	3	1	1	0	53.1	49.4	-3.7	2.9	2	-0.9	0	0	0	1	1	2	0.926732
73	1	1	2	2	4	5	1	1	0	61.15	missing		3.6	2.8	-0.8	0	0	0	1	1	1	2.01086
50	1	1	1	4	2	10	2	0	2	48.6	49.9	1.3	4.5	4	-0.5	0	0	0	0	1	2	11.8483
49	1	2	1	4	4	5	1	2	0	50.5	51.8	1.3	3.9	3.1	-0.8	0	0	0	0	1	2	2.10908
76	2	2	1	3	1	2	2	0	0	50375	missing		4	missing		0	0	0	0	1	1	7.97616
62	1	2	1	4	3	5	2	2	0	57	52.7	-4.3	3.8	2.9	-0.9	1	2	4	1	1	2	8.30568
68	1	1	2	4	3	4	1	1	0	63	65.8	2.8	3.3	3.2	-0.1	0	0	0	0	1	2	1.06219
84	1	1	1	4	4	3	1	1	0	79	74.15	-4.85	4	3	-1	0	0	0	0	1	2	8.10635
64	1	1	1	2	4	2	1	1	0	48.8	47.15	-1.65	3.9	3.9	0	0	0	0	0	1	1	4.79785
58	1	2	1	4	4	7	2	2	2	57	58.6	1.6	4.4	4.2	-0.2	0	0	0	0	1	2	27.6825
50	1	2	1	4	4	3	1	1	0	55	54	-1	3.7	3.1	-0.6	0	0	0	0	1	2	2.89886
61	1	1	1	3	4	3	2	2	2	53.6	45	-8.6	3.9	2	-1.9	0	0	0	0	1	1	5.29081
60	1	1	1	4	4	1	2	0	2	54.55	56.4	1.85	4.7	3.6	-1.1	0	0	0	1	1	2	5.19401
51	2	2	1	3	4	1	2	2	0	42.65	43.2	0.55	4	4	0	0	0	0	0	0	1	23.4027
64	1	2	1	4	4	7	1	1	0	52.8	58.5	5.7	3.5	1.9	-1.6	0	0	0	0	1	2	2.01099
77	1	2	1	3	2	3.5	2	0	0	56.7	56.3	-0.4	4.2	3.8	-0.4	0	0	0	0	1	1	6.43741
62	1	2	1	4	2	8	1	1	0	62.4	63.4	1	3.3	4.5	1.2	0	0	0	0	0	2	16.176
88	1	2	1	3	4	7	0	0	0	41.2	36.9	-4.3	2.3	2.1	-0.2	0	0	0	1	1	1	16.137
79	2	1	1	4	3	3	0	1	0	50.1	48.6	-1.5	4.1	missing		0	0	0	0	1	2	3.75169
75	1	1	1	2	4	5	2	1	0	60	60	0	3.6	missing		0	0	0	0	1	1	7.65065
74	1	2	1	4	4	4.5	0	2	0	50.1	45	-5.1	4.5	4.3	-0.2	0	0	0	0	1	2	7.08197
76	2	2	1	4	2	9	0	0	0	33	33	0	3.8	3.3	-0.5	0	0	0	0	0	2	15.0932
60	2	1	1	4	3	8	1	0	0	45	44	-1	4.2	3.7	-0.5	0	0	0	0	1	2	1.78188
44	1	1	1	4	4	7	1	2	0	51.5	47.7	-3.8	3.1	4.3	1.2	1	1	0	0	1	2	6.24107
57	1	2	1	4	1	8	1	0	0	66.9	67.8	0.9	4.1	4.3	0.2	0	0	0	1	1	2	2.99416
64	1	1	1	3	3	7	2	0	0	60	60	0	4.1	missing		0	0	0	0	1	1	3.55384
68	1	1	1	4	2	1	2	0	0	63.9	64.3	0.4	3.6	3.1	-0.5	0	0	0	0	1	2	2.13854
54	1	2	1	3	1	7	2	2	2	56.7	50.6	-6.1	3.7	3.6	-0.1	0	0	0	0	1	1	15.2566
82	1	1	1	2	4	7	2	0	0	36.1	missing		3.1	missing		0	0	0	0	1	1	3.42345
64	1	2	1	2	4	4	1	1	0	48.3	48	-0.3	2.4	3.6	1.2	0	0	0	1	1	1	0.829795
69	1	1	1	4	4	10	1	1	0	42	50	8	4.3	2.3	-2	0	0	0	0	1	2	1.32954
66	2	1	1	3	4	5	2	2	2	missing	missing		4.2	missing		1	1	0	0	1	1	8.37121
69	1	1	1	4	3	7	1	0	0	51.05	53	1.95	3.4	3.7	0.3	0	0	0	0	0	2	11.8456
58	1	2	1	3	1	4	2	2	0	56.2	57.95	1.75	4.3	3.8	-0.5	0	0	0	0	0	1	22.6998
61	1	2	1	3	1	3	2	2	0	56.4	55	-1.4	4.5	4.3	-0.2	0	0	0	0	0	1	21.0267
58	1	1	1	4	4	10	1	0	0	46	50.7	4.7	3.6	3.4	-0.2	0	0	0	0	0	2	12.2677
51	1	2	1	3	4	10	2	2	2	44	45.35	1.35	4.3	4.7	0.4	0	0	0	0	1	1	15.3545
45	2	2	1	4	1	10	1	1	2	50.6	49.75	-0.85	4.4	3.7	-0.7	0	0	0	0	0	2	9.77424
64	1	2	1	4	4	3	1	1	0	45.8	43.2	-2.6	2.9	2.8	-0.1	0	0	0	1	1	2	3.19036
75	1	2	1	3	1	5	0	1	0	47	missing		2.7	missing		0	0	0	0	1	1	1.25401
53	1	2	1	3	1	5	1	1	0	54.4	52.4	-2	4.6	4.4	-0.2	0	0	0	0	0	1	4.33698
63	1	2	1	4	2	10	1	1	0	60.2	missing 사망		2.9	missing 사망		0	0	0	0	1	2	0.732241
72	1	2	1	3	2	6	2	2	0	45.1	44.5	-0.6	3.9	3.9	0	0	0	0	0	0	1	2.8616
50	1	1	1	3	2	4	1	2	0	58	56.4	-1.6	3.7	4	0.3	1	1	0	0	0	1	4.99089
71	1	2	1	3	4	8	1	1	2	51.5	missing		4.3	missing		0	0	0	0	0	1	18.214
84	2	2	1	4	4	3	0	1	0	42.9	missing		3.8	missing		0	0	0	0	0	2	0.43887
61	1	1	1	3	4	7	1	0	2	missing	missing		4.4	3.7	-0.7	0	0	0	0	1	1	11.5192

## Sheet: 코딩표
	n=233
Variable	Format	Coding	비고
ID	고유번호
Age	연속형
Sex	범주형	1=남자 2=여자
group	범주형	1=스텐트 2=위루술
procedure type	범주형	1=내시경 2=영상
Histology	범주형	1=squamous cell ca 2=others 9=결측값
Stage	범주형	1=Stage I 2=Stage II 3=Stage III 4=Stage IV 9=결측값
Location	범주형	1=cervical 2=upper 3=mid 4=lower
tumor length	연속형
CTx	범주형	0= 시행안함 1= 시술전 시행 2=시술후 시행
RTx	범주형	0= 시행안함 1= 시술전 시행 2=시술후 시행
Op	범주형	0= 시행안함 1= 시술전 시행 2=시술후 시행
wt.change	연속형		secondary outcome
albumin change	연속형		secondary outcome
AI	범주형	0= 시행안함 1= 시행함	secondary outcome
numbers of intervention	연속형		secondary outcome
complication	범주형	0= 없음 4= 있음	secondary outcome
aspiration pn	범주형	0= 없음 1= 있음	secondary outcome
death	범주형	0= 사망안함 1 = 사망	Primary outcome
survival days	연속형		Primary outcome
